# Supplementary material for: New observations of the enigmatic West African Cellana limpet (Mollusca: Gastropoda: Nacellidae)
Source: Springer Nature journal article supplement (doi:10.1186/s41200-016-0059-9), 2016-06-23
Supplement: MOESM1 [file 41200_2016_59_MOESM1_ESM.pdf]

**Additional file.** Accession codes with links to BOLD and Genbank sequences used in inference of the gene tree in Figure 1. Numbers in brackets refer to reference list.

| <b>Taxon name</b>               | <b>BOLD</b>                 | <b>Genbank</b>           | <b>Region</b>  | <b>Reference</b>            |
|---------------------------------|-----------------------------|--------------------------|----------------|-----------------------------|
| <b>Patellidae</b>               |                             |                          |                |                             |
| <i>Cymbula compressa</i>        | GBMLG3282-07                | <a href="#">AB238570</a> | South Africa   | [22]                        |
| <i>Cymbula miniata</i>          | GBMLG3281-07                | <a href="#">AB238571</a> | South Africa   | [22]                        |
| <i>Cymbula oculus</i>           | GBMLG3280-07                | <a href="#">AB238572</a> | South Africa   | [22]                        |
| <i>Cymbula safiana</i>          | GBMLG3279-07                | <a href="#">AB238573</a> | Spain          | [22]                        |
| <i>Cymbula safiana</i>          | GBMGD526-14                 | <a href="#">AB445054</a> | Morocco        | [7] as <i>Cymbula nigra</i> |
| <i>Cymbula safiana</i>          | GBMGD512-14                 | <a href="#">AB445081</a> | Morocco        | [7] as <i>Cymbula nigra</i> |
| <i>Cymbula safiana</i>          | GBMGD522-14                 | <a href="#">AB445086</a> | Morocco        | [7] as <i>Cymbula nigra</i> |
| <i>Cymbula safiana</i>          | GBMGD572-14                 | <a href="#">AB445093</a> | Morocco        | [7] as <i>Cymbula nigra</i> |
| <i>Cymbula safiana</i>          | GBMGD563-14                 | <a href="#">AB445094</a> | Morocco        | [7] as <i>Cymbula nigra</i> |
| <i>Cymbula safiana</i>          | GBMGD567-14                 | <a href="#">AB445098</a> | Morocco        | [7] as <i>Cymbula nigra</i> |
| <i>Cymbula safiana</i>          | GBMLG2001-06                | <a href="#">DQ089563</a> | Spain          | [33]                        |
| <i>Patella caerulea</i>         | GBMLG11141-13               | <a href="#">JN105781</a> | Mediterranean  | [32]                        |
| <i>Patella caerulea</i>         | GBMLG11140-13               | <a href="#">JN105782</a> | Mediterranean  | [32]                        |
| <i>Patella candei</i>           | GBMLG11124-13               | <a href="#">JN105798</a> | Mediterranean  | [32]                        |
| <i>Patella candei</i>           | GBMLG11122-13               | <a href="#">JN105800</a> | Mediterranean  | [32]                        |
| <i>Patella depressa</i>         | GBMLG11219-13               | <a href="#">JF937114</a> | Spain          | [20]                        |
| <i>Patella ferruginea</i>       | GBMLG0163-06                | <a href="#">AB201514</a> | Tunisia        | [7]                         |
| <i>Patella ferruginea</i>       | GBMLG0166-06                | <a href="#">AB201517</a> | Tunisia        | [7]                         |
| <i>Patella lugubris</i>         | GBMLG2014-06                | <a href="#">DQ089576</a> |                | [33]                        |
| <i>Patella lugubris</i>         | GBMLG2015-06                | <a href="#">DQ089577</a> |                | [33]                        |
| <i>Patella lugubris</i>         | GBMLG5547-08                | <a href="#">EU073889</a> | Cape Verde     | [34]                        |
| <i>Patella rustica</i>          | GBMLG13220-13               | <a href="#">HF547409</a> | France         | [36]                        |
| <i>Patella rustica</i>          | GBMLG13213-13               | <a href="#">HF547416</a> | Spain          | [36]                        |
| <i>Patella rustica</i>          | GBMLG13208-13               | <a href="#">HF547421</a> | Portugal       | [36]                        |
| <i>Patella rustica</i>          | GBMLG13187-13               | <a href="#">HF547442</a> | Morocco        | [36]                        |
| <i>Patella</i> sp. CRE03        | GBMGD070-10                 | <a href="#">GU205469</a> | Greece         | [35]                        |
| <i>Patella</i> sp. OLU125       | GBMGD069-10                 | <a href="#">GU205470</a> | Turkey         | [35]                        |
| <i>Patella ulyssiponensis</i>   | GBMLG13266-13               | <a href="#">HF547557</a> | Spain          | [36]                        |
| <i>Patella ulyssiponensis</i>   | GBMLG13259-13               | <a href="#">HF547564</a> | Morocco        | [36]                        |
| <i>Patella ulyssiponensis</i>   | GBMLG13237-13               | <a href="#">HF547586</a> | Italy          | [36]                        |
| <i>Patella vulgata</i>          | GBMLG11172-13               | <a href="#">JF937161</a> | Spain          | [20]                        |
| <i>Patella vulgata</i>          | GBMLG11162-13               | <a href="#">JF937171</a> | Spain          | [20]                        |
| <i>Scutellastra barbara</i>     | GBMLG3271-07                | <a href="#">AB238581</a> | South Africa   | [22]                        |
| <i>Scutellastra exusta</i>      | GBMLG3270-07                | <a href="#">AB238582</a> | Madagascar     | [22]                        |
| <i>Scutellastra flexuosa</i>    | GBMLG3269-07                | <a href="#">AB238583</a> | Japan          | [22]                        |
| <i>Scutellastra flexuosa</i>    | <a href="#">MBMIB697-06</a> | -                        | F Polynesia    | unpublished                 |
| <i>Scutellastra laticostata</i> | GBMLG3268-07                | <a href="#">AB238584</a> | Australia:WA   | [22]                        |
| <i>Scutellastra optima</i>      | GBMLG3267-07                | <a href="#">AB238585</a> | Japan          | [22]                        |
| <i>Scutellastra peronii</i>     | GBMLG3266-07                | <a href="#">AB238586</a> | Australia:WA   | [22]                        |
| <i>Scutellastra</i> sp. ESU 1   | GBMLG3265-07                | <a href="#">AB238587</a> | Madagascar     | [22]                        |
| <b>Nacellidae</b>               |                             |                          |                |                             |
| <i>Nacella flammea</i>          | GBMLG10473-13               | <a href="#">HQ997302</a> | Southern Ocean | [11]                        |
| <i>Nacella flammea</i>          | GBMGD009-10                 | <a href="#">GU901257</a> | Southern Ocean | [10]                        |

|                              |               |                          |                |             |
|------------------------------|---------------|--------------------------|----------------|-------------|
| <i>Nacella flammea</i>       | GBMLG10479-13 | <a href="#">HQ997290</a> | Southern Ocean | [11]        |
| <i>Nacella mytilina</i>      | GBMGD019-10   | <a href="#">GU901247</a> | Southern Ocean | [10]        |
| <i>Nacella mytilina</i>      | GBMLG9600-13  | <a href="#">EU870922</a> | Southern Ocean | [ 5]        |
| <i>Cellana denticulata</i>   | GBMLG7050-09  | <a href="#">AB238544</a> | New Zealand    | [22]        |
| <i>Cellana denticulata</i>   | GBMGD561-14   | <a href="#">GQ455938</a> | New Zealand    | [ 2]        |
| <i>Cellana eucosmia</i>      | GBMLG7051-09  | <a href="#">AB238543</a> | Egypt          | [ 2]        |
| <i>Cellana exarata</i>       | GBMGD582-14   | <a href="#">GQ455942</a> | Hawaii         | [ 2]        |
| <i>Cellana exarata</i>       | GBMLG10563-13 | <a href="#">JF340166</a> | Hawaii         | [ 2]        |
| <i>Cellana flava</i>         | GBMLG3307-07  | <a href="#">AB238545</a> | New Zealand    | [22]        |
| <i>Cellana grata</i>         | GBMGD505-14   | <a href="#">GQ455948</a> | Japan          | [14]        |
| <i>Cellana grata</i>         | GBMGD430-14   | <a href="#">GQ455945</a> | China          | [ 2]        |
| <i>Cellana karachiensis/</i> | GBMLG3305-07  | <a href="#">AB238547</a> | Oman           | [22]        |
| <i>Cellana karachiensis/</i> | MOLSK001-13   | <a href="#">KF840077</a> | India          | unpublished |
| <i>Cellana mazatlandica</i>  | GBMGD485-14   | <a href="#">GQ455951</a> | Japan          | [ 2]        |
| <i>Cellana nigrolineata</i>  | GBMGD438-14   | <a href="#">AB548176</a> | Japan          | [25]        |
| <i>Cellana nigrolineata</i>  | GBMLG2066-06  | <a href="#">DQ093515</a> | Japan          | [ 8]        |
| <i>Cellana nigrolineata</i>  | GBMGD508-14   | <a href="#">GQ455956</a> | Japan          | [ 2]        |
| <i>Cellana nigrolineata</i>  | GBMGD438-14   | <a href="#">AB548176</a> | Japan          | [25]        |
| <i>Cellana ornata</i>        | GBMLG3303-07  | <a href="#">AB238549</a> | New Zealand    | [22]        |
| <i>Cellana pricei</i>        | GBMLG3302-07  | <a href="#">AB238550</a> | Samoa          | [22]        |
| <i>Cellana radians</i>       | GBMGD562-14   | <a href="#">GQ455963</a> | New Zealand    | [ 2]        |
| <i>Cellana radians</i>       | GBMLG3301-07  | <a href="#">AB238551</a> | New Zealand    | [22]        |
| <i>Cellana radiata</i>       | GBMLG3300-07  | <a href="#">AB238552</a> | South Africa   | [22]        |
| <i>Cellana radiata</i>       | GBMLG3299-07  | <a href="#">AB238553</a> | Madagascar     | [22]        |
| <i>Cellana radiata</i>       | GBMLG3298-07  | <a href="#">AB238554</a> | Japan          | [22]        |
| <i>Cellana radiata</i>       | GBMLG3296-07  | <a href="#">AB238556</a> | Indonesia      | [22]        |
| <i>Cellana radiata</i>       | GBMLG3295-07  | <a href="#">AB238557</a> | India          | [22]        |
| <i>Cellana radiata</i>       | GBMLG7049-09  | <a href="#">AB238558</a> | Sri Lanka      | [22]        |
| <i>Cellana radiata</i>       | GBMLG7047-09  | <a href="#">AB238560</a> | Australia      | [22]        |
| <i>Cellana radiata</i>       | GBMLG8430_09  | <a href="#">AB433643</a> | Madagascar     | [24]        |
| <i>enneagona</i>             |               |                          |                |             |
| <i>Cellana radiata</i>       | GBMLG8431_09  | <a href="#">AB433644</a> | Japan          | [24]        |
| <i>enneagona</i>             |               |                          |                |             |
| <i>Cellana radiata</i>       | GBMLG8432_09  | <a href="#">AB433645</a> | Japan          | [24]        |
| <i>enneagona</i>             |               |                          |                |             |
| <i>Cellana radiata</i>       | GBMLG8433_09  | <a href="#">AB433646</a> | Japan          | [24]        |
| <i>enneagona</i>             |               |                          |                |             |
| <i>Cellana rota</i>          | GBMGD437-14   | <a href="#">GQ455968</a> | Israel         | [ 2]        |
| <i>Cellana sandwicensis</i>  | GBMLG2765-07  | <a href="#">EF621290</a> | Hawaii         | [ 2]        |
| <i>Cellana sandwicensis</i>  | GBMLG2755-0   | <a href="#">EF621300</a> | Hawaii         | [ 2]        |
| <i>Cellana solida</i>        | GBMLG7046-09  | <a href="#">AB238561</a> | Tasmania       | [22]        |
| <i>Cellana solida</i>        | GBMGD428-14   | <a href="#">GQ455974</a> | Tasmania       | [ 2]        |
| <i>Cellana</i> sp. CEB2010   | GBMGD427-14   | <a href="#">GQ455986</a> | Australia      | [ 2]        |
| <i>Cellana stellifera</i>    | GBMLG8435-09  | <a href="#">AB433648</a> | New Zealand    | [24]        |
| <i>Cellana strigilis</i>     | GBMLG8436-09  | <a href="#">AB433649</a> | New Zealand    | [24]        |
| <i>Cellana taitensis</i>     | MBMIB355-06   | -                        | F Polynesia    | unpublished |
| <i>Cellana talcosa</i>       | GBMLG3023-07  | <a href="#">EF621032</a> | Hawaii         | [ 2]        |
| <i>Cellana talcosa</i>       | GBMGD585-14   | <a href="#">GQ455978</a> | Hawaii         | [ 2]        |
| <i>Cellana testudinaria</i>  | GBMLG3289-07  | <a href="#">AB238563</a> | Japan          | [22]        |
| <i>Cellana toreuma</i>       | GBMLG3287-07  | <a href="#">AB238565</a> | Indonesia      | [21]        |
| <i>Cellana toreuma</i>       | GBMGD062-10   | <a href="#">AB445024</a> | Japan          | [21]        |
| <i>Cellana toreuma</i>       | GBMGD050-10   | <a href="#">AB445036</a> | Ghana          | [21]        |

---

|                             |                             |                          |           |               |
|-----------------------------|-----------------------------|--------------------------|-----------|---------------|
| <i>Cellana toreuma</i>      | GBMGD049-10                 | <a href="#">AB445037</a> | Ghana     | [21]          |
| <i>Cellana toreuma</i>      | GBMIN6062-12                | <a href="#">JQ313490</a> | China     | [ 6]          |
| <i>Cellana toreuma</i>      | GBMGD679-15                 | <a href="#">KM221066</a> | China     | [18]          |
| <i>Cellana tramoserica</i>  | GBMLG3286-07                | <a href="#">AB238566</a> | Australia | [22]          |
| <i>Cellana tramoserica</i>  | GBMLG0744-06                | <a href="#">AY296818</a> | Australia | [ 4]          |
| <i>Notoacmea schrenckii</i> | GBMIN5918-12                | <a href="#">HM180723</a> | Korea     | [16]          |
| <i>Cellana</i> sp. Nigeria  | <a href="#">NMFDN028-15</a> | -                        | Nigeria   | present paper |
| <i>Cellana</i> sp. Nigeria  | <a href="#">NMFDN029-15</a> | -                        | Nigeria   | present paper |
| <i>Cellana</i> sp. Nigeria  | <a href="#">NMFDN030-15</a> | -                        | Nigeria   | present paper |
| <i>Cellana</i> sp. Nigeria  | <a href="#">NMFDN063-15</a> | -                        | Nigeria   | present paper |
| <i>Cellana</i> sp. Nigeria  | <a href="#">NMFDN064-15</a> | -                        | Nigeria   | present paper |

---
